# Supplementary material for: Phylogenetic Analysis of the PR-4 Gene Family in Euphorbiaceae and Its Expression Profiles in Tung Tree (Vernicia fordii)
Source: MDPI journal article supplement (doi:10.3390/plants12173154), 2023-09-01
Supplement: s1 [file s1]

**Supplementary Table 1 Primer of PR-4 genes in tung tree**

| Primer name           | Primer sequence (5'→3')                   | T <sub>m</sub> value (°C) | Primer function               |
|-----------------------|-------------------------------------------|---------------------------|-------------------------------|
| VF16136-PR4-dlF1      | TGAGCAATGTGGTAGGCAAG                      | 60                        | Quantitative real-time PCR    |
| VF16136-PR4-dlR1      | ACTGCATTTCAGATCCCATCC                     |                           |                               |
| VF16135-PR4-dlF1      | GCACAAATTGGATGGGACTT                      | 60                        | Quantitative real-time PCR    |
| VF16135-PR4-dlR1      | GTAAGCAACTGCCACAAGCA                      |                           |                               |
| VF16136-F             | ATGGGAAGAGTTATTAAAATATGTAT                | 51                        | Gene clone                    |
| VF16136-R             | TTACTGATCATCTATAATAGAAAGCA                |                           |                               |
| VF16135-F             | ATGGGAAGGGTAATTAGCATAA                    | 51.5                      | Gene clone                    |
| VF16135-R             | TTAATCACCACAATTAACAAACTG                  |                           |                               |
| VF16136-1300-F        | AAGAGACAGGATCCGAATTCATGGGAAGAGTTATTAAAAT  | 56                        | Subcellular location analysis |
| VF16136-1300-R        | ATCGGTGCACTAGTGTCTGACCTGATCATCTATAATAGAAA |                           |                               |
| VF16135-1300-F        | AAGAGACAGGATCCGAATTCATGGGAAGGGTAATTAGCAT  | 56                        | Subcellular location analysis |
| VF16135-1300-R        | ATCGGTGCACTAGTGTCTGACATCACCACAATTAACAAACT |                           |                               |
| JQ680036_EF1 $\alpha$ | GCCTGGTATGGTTGTGACCT                      | 60                        | Reference gene                |
| JQ680036_EF1 $\alpha$ | GGATCATCCTTGGAGTTGGA                      |                           |                               |
