# Supplementary material for: Phylogenetic Analysis of the PR-4 Gene Family in Euphorbiaceae and Its Expression Profiles in Tung Tree (Vernicia fordii)
Source: MDPI journal article supplement (doi:10.3390/plants12173154), 2023-09-01
Supplement: s1 [file s1]

>VF16135

MGRVIKICIVLLCLVGGSVAEQCGRQAGGKLCNNLCCSQFGWCGSSDDYCSPSKNCQS  
NCEGGGGGGGQSASNV RATYHLYNPQQHGWDLNAVSAYCSTWDANKPYSWRSKYGWTAFC  
GPVGPRGQASCGKCLRVTNTRTGAQTTVRIVDQCSNGGLDLVNVFRKLDTDGKGYQQGH  
LTVNYQFVNCGDSFNPLLSIIDQ

>VF16136

MGRVISIILCTVFLVFLIVRANSQSASNV RATYNPYNPAQIGWDLNTASVFCATWDAGKP  
LEWRQKYGWTAFCGPVGPQQDACGSCLLVNTGTGAQVTVRIVDQCSNGGLDLEEGVFR  
QIDTDGKGIAQGH LIVNYQFVNCGD
